# Supplementary material for: On-chip fluorescent labeling using reversed-phase monoliths and microchip electrophoretic separations of selected preterm birth biomarkers
Source: Royal Society of Chemistry journal article supplement (doi:10.1039/c6ay01803c), 2016-01-01
Supplement: c6ay01803c1.pdf [file c6ay01803c1.pdf]

**Electronic Supplementary Information for**

**On-Chip Fluorescent Labeling using Reversed-phase Monoliths and**

**Microchip Electrophoretic Separations of Selected Preterm Birth Biomarkers**

Mukul Sonker, Rui Yang, Vishal Sahore, Suresh Kumar and Adam T. Woolley\*

Department of Chemistry and Biochemistry, Brigham Young University, Provo 84602, UT, USA

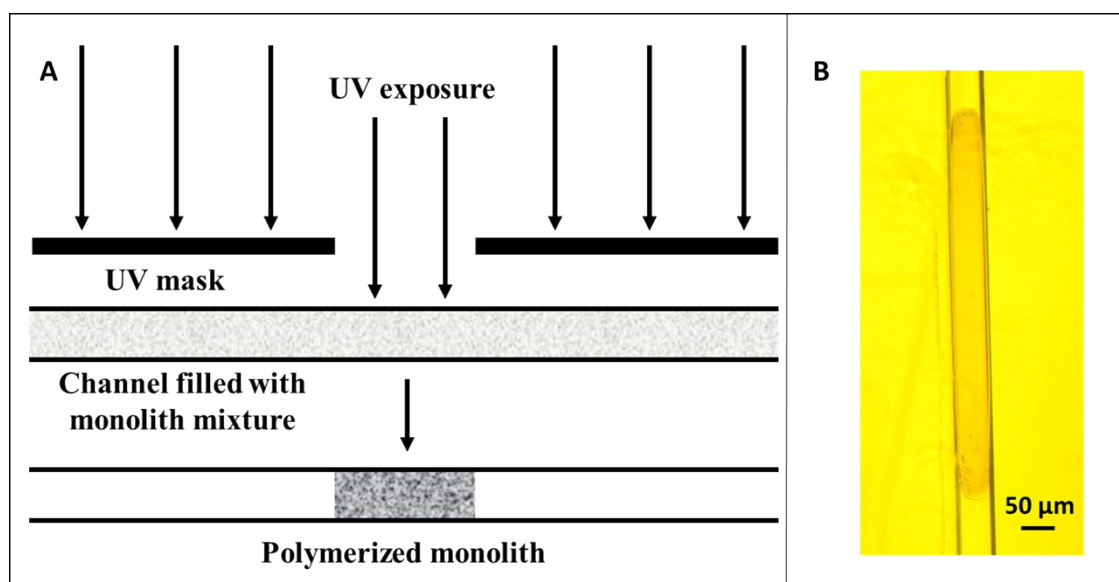

**Figure S1.** Monolith fabrication. (A) Schematic showing monolith fabrication via UV polymerization. (B) Photograph of a C8 monolith polymerized in a channel that has been filled with a 1:1 IPA:water mixture.
